# Supplementary material
Source: PubMed Central journal article supplement (PMC3274362)
Supplement: supp_139.5.1013_DEV073221TableS1.pdf [file supp_139.5.1013_DEV073221TableS1.pdf]

**Gene****Forward Primer**

---

|                       |                                    |
|-----------------------|------------------------------------|
| <i>NvanthoRFamide</i> | TTC CGA TCC GCA GTT CTG GAA G      |
| <i>Nvelav</i>         | CTC AAA CTG GAC AAA GGC TAC GGC    |
| 118015                | GAA CTT CTC CCC GAT GTT CTT CTA GA |
| 12533                 | CCA TTA ACG TGC AGC GTG CAA G      |
| 242283                | AGA ATG AGA CGG TCG GTC AAG AAG G  |
| 127924                | GAT CCA GAT CTA CCT GCC GTC CTA TC |
| 239910                | GCA TAC CAC GAG CTG AAA GCA C      |
| 51544                 | CGG AAA AGA ACG CAC GAC AAC AG     |

## Reverse Primer

---

CCT CGT GAT GAT GCT TGT GAT GAC C

TTA GGC AGC AGA TAG CAT GGC ACG

CAT CCG ATA AAT GGC TCT CAC AAG C

TTC CCA AAG CTC GTC ATC CGT G

GGG CAG ACA TTG ATC TTC GGA TTT C

GCT TGA TAC ACC AAG CCC CTT AAG C

GTA ATC ATA GCT GAT AGC TGA TG

AAC ACA AGC TGG GTC TTG CTC GTC
